# Supplementary material
Source: MDPI journal article supplement (https://www.mdpi.com/1424-2818/8/4/32)
Supplement: s1 [file s1]

## Sheet: Sample information
Supplementary material
Phylogeography of Rattus norvegicus in the South Atlantic Ocean
Melanie Hingston, Sally Poncet, Ken Passfield, Michael A. Tabak, this study I. Gabriel, Stuart B. Piertney, James C. Russell
Table S1: Sample information
Country	ISO 3166 code	Sample location (if known)	Source	U-ID	GenBank No	Haplotype
Sweden	SE		Abhyankar et al., 2009 [1]		FJ919765	RnHD01
United Kingdom	UK	Berkshire	Haniza et al., 2015 [2]		DQ897636	RnHD02
United Kingdom	UK	Berkshire	Haniza et al., 2015 [2]		DQ897634	RnHD02
United Kingdom	UK	Berkshire	Haniza et al., 2015 [2]		DQ897634	RnHD02
United Kingdom	UK	Berkshire	Haniza et al., 2015 [2]		DQ897634	RnHD02
United Kingdom	UK	Berkshire	Haniza et al., 2015 [2]		DQ897634	RnHD02
United Kingdom	UK	Berkshire	Haniza et al., 2015 [2]		DQ897634	RnHD02
United Kingdom	UK	Berkshire	Haniza et al., 2015 [2]		DQ897634	RnHD02
United Kingdom	UK	Cambridgeshire	Haniza et al., 2015 [2]		DQ897634	RnHD02
United Kingdom	UK	Cambridgeshire	Haniza et al., 2015 [2]		DQ897634	RnHD02
United Kingdom	UK	Cambridgeshire	Haniza et al., 2015 [2]		DQ897637	RnHD05
United Kingdom	UK	Dorset	Haniza et al., 2015 [2]		DQ897634	RnHD02
United Kingdom	UK	Dorset	Haniza et al., 2015 [2]		DQ897634	RnHD02
United Kingdom	UK	Dorset	Haniza et al., 2015 [2]		DQ897634	RnHD02
United Kingdom	UK	Dorset	Haniza et al., 2015 [2]		DQ897634	RnHD02
United Kingdom	UK	Dorset	Haniza et al., 2015 [2]		DQ897634	RnHD02
United Kingdom	UK	Dorset	Haniza et al., 2015 [2]		DQ897634	RnHD02
United Kingdom	UK	Dorset	Haniza et al., 2015 [2]		DQ897634	RnHD02
United Kingdom	UK	Gloucestershire	Haniza et al., 2015 [2]		DQ897634	RnHD02
United Kingdom	UK	Kent	Haniza et al., 2015 [2]		DQ897634	RnHD02
United Kingdom	UK	Kent	Haniza et al., 2015 [2]		DQ897634	RnHD02
United Kingdom	UK	Kent	Haniza et al., 2015 [2]		DQ897634	RnHD02
United Kingdom	UK	Kent	Haniza et al., 2015 [2]		DQ897634	RnHD02
United Kingdom	UK	Oxfordshire	Haniza et al., 2015 [2]		DQ897634	RnHD02
United Kingdom	UK	Oxfordshire	Haniza et al., 2015 [2]		DQ897634	RnHD02
United Kingdom	UK	Oxfordshire	Haniza et al., 2015 [2]		DQ897634	RnHD02
United Kingdom	UK	Oxfordshire	Haniza et al., 2015 [2]		DQ897634	RnHD02
United Kingdom	UK	Oxfordshire	Haniza et al., 2015 [2]		DQ897634	RnHD02
United Kingdom	UK	Oxfordshire	Haniza et al., 2015 [2]		DQ897634	RnHD02
United Kingdom	UK	Salop	Haniza et al., 2015 [2]		DQ897634	RnHD02
United Kingdom	UK	Salop	Haniza et al., 2015 [2]		DQ897634	RnHD02
United Kingdom	UK	Salop	Haniza et al., 2015 [2]		DQ897634	RnHD02
United Kingdom	UK	Sussex	Haniza et al., 2015 [2]		DQ897634	RnHD02
United Kingdom	UK	Sussex	Haniza et al., 2015 [2]		DQ897634	RnHD02
United Kingdom	UK	Sussex	Haniza et al., 2015 [2]		DQ897634	RnHD02
United Kingdom	UK	Welshpool	Haniza et al., 2015 [2]		DQ897634	RnHD02
United Kingdom	UK	Wiltshire	Haniza et al., 2015 [2]		DQ897634	RnHD02
United Kingdom	UK	Wiltshire	Haniza et al., 2015 [2]		DQ897634	RnHD02
United Kingdom	UK	Wiltshire	Haniza et al., 2015 [2]		DQ897637	RnHD05
United Kingdom	UK	Yorkshire	Haniza et al., 2015 [2]		DQ897634	RnHD02
United Kingdom	UK	Yorkshire	Haniza et al., 2015 [2]		DQ897634	RnHD02
United Kingdom	UK	Yorkshire	Haniza et al., 2015 [2]		DQ897634	RnHD02
United Kingdom	UK	Yorkshire	Haniza et al., 2015 [2]		DQ897634	RnHD02
United Kingdom	UK	Yorkshire	Haniza et al., 2015 [2]		DQ897634	RnHD02
United Kingdom	UK	Yorkshire	Haniza et al., 2015 [2]		DQ897634	RnHD02
United Kingdom	UK	Yorkshire	Haniza et al., 2015 [2]		DQ897634	RnHD02
United Kingdom	UK	Yorkshire	Haniza et al., 2015 [2]		DQ897634	RnHD02
United Kingdom	UK	Yorkshire	Haniza et al., 2015 [2]		DQ897634	RnHD02
United Kingdom	UK	Yorkshire	Haniza et al., 2015 [2]		DQ897634	RnHD02
United Kingdom	UK	Yorkshire	Haniza et al., 2015 [2]		DQ897634	RnHD02
United Kingdom	UK	Yorkshire	Haniza et al., 2015 [2]		DQ897634	RnHD02
United Kingdom	UK	Yorkshire	Haniza et al., 2015 [2]		DQ897634	RnHD02
United Kingdom	UK	Yorkshire	Haniza et al., 2015 [2]		DQ897634	RnHD02
United Kingdom	UK	Berkshire	Haniza et al., 2015 [2]		DQ897633	RnHD01
United Kingdom	UK	Berkshire	Haniza et al., 2015 [2]		DQ897633	RnHD01
United Kingdom	UK	Berkshire	Haniza et al., 2015 [2]		DQ897633	RnHD01
United Kingdom	UK	Berkshire	Haniza et al., 2015 [2]		DQ897633	RnHD01
United Kingdom	UK	Berkshire	Haniza et al., 2015 [2]		DQ897633	RnHD01
United Kingdom	UK	Berkshire	Haniza et al., 2015 [2]		DQ897633	RnHD01
United Kingdom	UK	Berkshire	Haniza et al., 2015 [2]		DQ897633	RnHD01
United Kingdom	UK	Berkshire	Haniza et al., 2015 [2]		DQ897633	RnHD01
United Kingdom	UK	Berkshire	Haniza et al., 2015 [2]		DQ897633	RnHD01
United Kingdom	UK	Berkshire	Haniza et al., 2015 [2]		DQ897633	RnHD01
United Kingdom	UK	Berkshire	Haniza et al., 2015 [2]		DQ897633	RnHD01
United Kingdom	UK	Berkshire	Haniza et al., 2015 [2]		DQ897633	RnHD01
United Kingdom	UK	Berkshire	Haniza et al., 2015 [2]		DQ897633	RnHD01
United Kingdom	UK	Berkshire	Haniza et al., 2015 [2]		DQ897633	RnHD01
United Kingdom	UK	Berkshire	Haniza et al., 2015 [2]		DQ897633	RnHD01
United Kingdom	UK	Berkshire	Haniza et al., 2015 [2]		DQ897633	RnHD01
United Kingdom	UK	Berkshire	Haniza et al., 2015 [2]		DQ897638	RnHD06
United Kingdom	UK	Berkshire	Haniza et al., 2015 [2]		DQ897633	RnHD01
United Kingdom	UK	Cambridgeshire	Haniza et al., 2015 [2]		DQ897633	RnHD01
United Kingdom	UK	Cambridgeshire	Haniza et al., 2015 [2]		DQ897633	RnHD01
United Kingdom	UK	Cambridgeshire	Haniza et al., 2015 [2]		DQ897633	RnHD01
United Kingdom	UK	Cambridgeshire	Haniza et al., 2015 [2]		DQ897633	RnHD01
United Kingdom	UK	Cambridgeshire	Haniza et al., 2015 [2]		DQ897633	RnHD01
United Kingdom	UK	Cambridgeshire	Haniza et al., 2015 [2]		DQ897633	RnHD01
United Kingdom	UK	Cambridgeshire	Haniza et al., 2015 [2]		DQ897633	RnHD01
United Kingdom	UK	Cambridgeshire	Haniza et al., 2015 [2]		DQ897633	RnHD01
United Kingdom	UK	Cambridgeshire	Haniza et al., 2015 [2]		DQ897633	RnHD01
United Kingdom	UK	Cambridgeshire	Haniza et al., 2015 [2]		DQ897633	RnHD01
United Kingdom	UK	Cambridgeshire	Haniza et al., 2015 [2]		DQ897633	RnHD01
United Kingdom	UK	Cambridgeshire	Haniza et al., 2015 [2]		DQ897633	RnHD01
United Kingdom	UK	Cambridgeshire	Haniza et al., 2015 [2]		DQ897633	RnHD01
United Kingdom	UK	Cambridgeshire	Haniza et al., 2015 [2]		DQ897633	RnHD01
United Kingdom	UK	Cambridgeshire	Haniza et al., 2015 [2]		DQ897633	RnHD01
United Kingdom	UK	Cambridgeshire	Haniza et al., 2015 [2]		DQ897633	RnHD01
United Kingdom	UK	Cambridgeshire	Haniza et al., 2015 [2]		DQ897633	RnHD01
United Kingdom	UK	Cambridgeshire	Haniza et al., 2015 [2]		DQ897633	RnHD01
United Kingdom	UK	Gloucestershire	Haniza et al., 2015 [2]		DQ897633	RnHD01
United Kingdom	UK	Gloucestershire	Haniza et al., 2015 [2]		DQ897633	RnHD01
United Kingdom	UK	Hampshire	Haniza et al., 2015 [2]		DQ897633	RnHD01
United Kingdom	UK	Hampshire	Haniza et al., 2015 [2]		DQ897633	RnHD01
United Kingdom	UK	Hampshire	Haniza et al., 2015 [2]		DQ897633	RnHD01
United Kingdom	UK	Hampshire	Haniza et al., 2015 [2]		DQ897633	RnHD01
United Kingdom	UK	Hampshire	Haniza et al., 2015 [2]		DQ897633	RnHD01
United Kingdom	UK	Hampshire	Haniza et al., 2015 [2]		DQ897633	RnHD01
United Kingdom	UK	Hampshire	Haniza et al., 2015 [2]		DQ897633	RnHD01
United Kingdom	UK	Hampshire	Haniza et al., 2015 [2]		DQ897633	RnHD01
United Kingdom	UK	Hampshire	Haniza et al., 2015 [2]		DQ897633	RnHD01
United Kingdom	UK	Kent	Haniza et al., 2015 [2]		DQ897633	RnHD01
United Kingdom	UK	Kent	Haniza et al., 2015 [2]		DQ897633	RnHD01
United Kingdom	UK	Kent	Haniza et al., 2015 [2]		DQ897633	RnHD01
United Kingdom	UK	Leicestershire	Haniza et al., 2015 [2]		DQ897633	RnHD01
United Kingdom	UK	Leicestershire	Haniza et al., 2015 [2]		DQ897633	RnHD01
United Kingdom	UK	Leicestershire	Haniza et al., 2015 [2]		DQ897633	RnHD01
United Kingdom	UK	Leicestershire	Haniza et al., 2015 [2]		DQ897633	RnHD01
United Kingdom	UK	Leicestershire	Haniza et al., 2015 [2]		DQ897633	RnHD01
United Kingdom	UK	Leicestershire	Haniza et al., 2015 [2]		DQ897633	RnHD01
United Kingdom	UK	Leicestershire	Haniza et al., 2015 [2]		DQ897633	RnHD01
United Kingdom	UK	Leicestershire	Haniza et al., 2015 [2]		DQ897633	RnHD01
United Kingdom	UK	Leicestershire	Haniza et al., 2015 [2]		DQ897633	RnHD01
United Kingdom	UK	Leicestershire	Haniza et al., 2015 [2]		DQ897633	RnHD01
United Kingdom	UK	Leicestershire	Haniza et al., 2015 [2]		DQ897633	RnHD01
United Kingdom	UK	Leicestershire	Haniza et al., 2015 [2]		DQ897633	RnHD01
United Kingdom	UK	Leicestershire	Haniza et al., 2015 [2]		DQ897633	RnHD01
United Kingdom	UK	Leicestershire	Haniza et al., 2015 [2]		DQ897633	RnHD01
United Kingdom	UK	Leicestershire	Haniza et al., 2015 [2]		DQ897633	RnHD01
United Kingdom	UK	Leicestershire	Haniza et al., 2015 [2]		DQ897633	RnHD01
United Kingdom	UK	Leicestershire	Haniza et al., 2015 [2]		DQ897633	RnHD01
United Kingdom	UK	Leicestershire	Haniza et al., 2015 [2]		DQ897633	RnHD01
United Kingdom	UK	Leicestershire	Haniza et al., 2015 [2]		DQ897633	RnHD01
United Kingdom	UK	Leicestershire	Haniza et al., 2015 [2]		DQ897633	RnHD01
United Kingdom	UK	Leicestershire	Haniza et al., 2015 [2]		DQ897633	RnHD01
United Kingdom	UK	Leicestershire	Haniza et al., 2015 [2]		DQ897633	RnHD01
United Kingdom	UK	Leicestershire	Haniza et al., 2015 [2]		DQ897633	RnHD01
United Kingdom	UK	Leicestershire	Haniza et al., 2015 [2]		DQ897633	RnHD01
United Kingdom	UK	Leicestershire	Haniza et al., 2015 [2]		DQ897633	RnHD01
United Kingdom	UK	Leicestershire	Haniza et al., 2015 [2]		DQ897633	RnHD01
United Kingdom	UK	Leicestershire	Haniza et al., 2015 [2]		DQ897633	RnHD01
United Kingdom	UK	Leicestershire	Haniza et al., 2015 [2]		DQ897633	RnHD01
United Kingdom	UK	Leicestershire	Haniza et al., 2015 [2]		DQ897633	RnHD01
United Kingdom	UK	Leicestershire	Haniza et al., 2015 [2]		DQ897633	RnHD01
United Kingdom	UK	Leicestershire	Haniza et al., 2015 [2]		DQ897633	RnHD01
United Kingdom	UK	Leicestershire	Haniza et al., 2015 [2]		DQ897633	RnHD01
United Kingdom	UK	Leicestershire	Haniza et al., 2015 [2]		DQ897633	RnHD01
United Kingdom	UK	Leicestershire	Haniza et al., 2015 [2]		DQ897633	RnHD01
United Kingdom	UK	Leicestershire	Haniza et al., 2015 [2]		DQ897633	RnHD01
United Kingdom	UK	Middlesex	Haniza et al., 2015 [2]		DQ897633	RnHD01
United Kingdom	UK	Middlesex	Haniza et al., 2015 [2]		DQ897633	RnHD01
United Kingdom	UK	Middlesex	Haniza et al., 2015 [2]		DQ897633	RnHD01
United Kingdom	UK	Oxfordshire	Haniza et al., 2015 [2]		DQ897633	RnHD01
United Kingdom	UK	Oxfordshire	Haniza et al., 2015 [2]		DQ897633	RnHD01
United Kingdom	UK	Oxfordshire	Haniza et al., 2015 [2]		DQ897633	RnHD01
United Kingdom	UK	Oxfordshire	Haniza et al., 2015 [2]		DQ897633	RnHD01
United Kingdom	UK	Sussex	Haniza et al., 2015 [2]		DQ897633	RnHD01
United Kingdom	UK	Sussex	Haniza et al., 2015 [2]		DQ897633	RnHD01
United Kingdom	UK	Sussex	Haniza et al., 2015 [2]		DQ897633	RnHD01
United Kingdom	UK	Sussex	Haniza et al., 2015 [2]		DQ897633	RnHD01
United Kingdom	UK	Sussex	Haniza et al., 2015 [2]		DQ897633	RnHD01
United Kingdom	UK	Sussex	Haniza et al., 2015 [2]		DQ897633	RnHD01
United Kingdom	UK	Sussex	Haniza et al., 2015 [2]		DQ897633	RnHD01
United Kingdom	UK	Sussex	Haniza et al., 2015 [2]		DQ897633	RnHD01
United Kingdom	UK	Sussex	Haniza et al., 2015 [2]		DQ897633	RnHD01
United Kingdom	UK	Welshpool	Haniza et al., 2015 [2]		DQ897633	RnHD01
United Kingdom	UK	Wiltshire	Haniza et al., 2015 [2]		DQ897633	RnHD01
United Kingdom	UK	Wiltshire	Haniza et al., 2015 [2]		DQ897633	RnHD01
United Kingdom	UK	Wiltshire	Haniza et al., 2015 [2]		DQ897633	RnHD01
United Kingdom	UK	Wiltshire	Haniza et al., 2015 [2]		DQ897633	RnHD01
United Kingdom	UK	Wiltshire	Haniza et al., 2015 [2]		DQ897633	RnHD01
United Kingdom	UK	Wiltshire	Haniza et al., 2015 [2]		DQ897633	RnHD01
United Kingdom	UK	Wiltshire	Haniza et al., 2015 [2]		DQ897633	RnHD01
United Kingdom	UK	Wiltshire	Haniza et al., 2015 [2]		DQ897633	RnHD01
United Kingdom	UK	Wiltshire	Haniza et al., 2015 [2]		DQ897633	RnHD01
United Kingdom	UK	Wiltshire	Haniza et al., 2015 [2]		DQ897633	RnHD01
United Kingdom	UK	Wiltshire	Haniza et al., 2015 [2]		DQ897633	RnHD01
United Kingdom	UK	Wiltshire	Haniza et al., 2015 [2]		DQ897633	RnHD01
United Kingdom	UK	Wiltshire	Haniza et al., 2015 [2]		DQ897633	RnHD01
United Kingdom	UK	Wiltshire	Haniza et al., 2015 [2]		DQ897633	RnHD01
United Kingdom	UK	Wiltshire	Haniza et al., 2015 [2]		DQ897633	RnHD01
United Kingdom	UK	Worcestershire	Haniza et al., 2015 [2]		DQ897633	RnHD01
United Kingdom	UK	Worcestershire	Haniza et al., 2015 [2]		DQ897633	RnHD01
United Kingdom	UK	Worcestershire	Haniza et al., 2015 [2]		DQ897633	RnHD01
United Kingdom	UK	Worcestershire	Haniza et al., 2015 [2]		DQ897633	RnHD01
United Kingdom	UK	Yorkshire	Haniza et al., 2015 [2]		DQ897633	RnHD01
United Kingdom	UK	Yorkshire	Haniza et al., 2015 [2]		DQ897633	RnHD01
United Kingdom	UK	Yorkshire	Haniza et al., 2015 [2]		DQ897633	RnHD01
United Kingdom	UK	Yorkshire	Haniza et al., 2015 [2]		DQ897633	RnHD01
United Kingdom	UK	Yorkshire	Haniza et al., 2015 [2]		DQ897633	RnHD01
United Kingdom	UK	Yorkshire	Haniza et al., 2015 [2]		DQ897633	RnHD01
United Kingdom	UK	Yorkshire	Haniza et al., 2015 [2]		DQ897633	RnHD01
United Kingdom	UK	Yorkshire	Haniza et al., 2015 [2]		DQ897633	RnHD01
United Kingdom	UK	Yorkshire	Haniza et al., 2015 [2]		DQ897633	RnHD01
United Kingdom	UK	Yorkshire	Haniza et al., 2015 [2]		DQ897633	RnHD01
United Kingdom	UK	Salop	Haniza et al., 2015 [2]		DQ897635	RnHD03
United Kingdom	UK	Worcestershire	Haniza et al., 2015 [2]		DQ897635	RnHD03
China	CN		Liu et al., 2012 [3]		HQ655891	RnHD13
China	CN		Liu et al., 2012 [3]		HQ655892	RnHD13
China	CN		Liu et al., 2012 [3]		HQ655893	RnHD13
China	CN		Liu et al., 2012 [3]		HQ655894	RnHD10
China	CN		Liu et al., 2012 [3]		HQ655895	RnHD13
China	CN		Liu et al., 2012 [3]		HQ655896	RnHD13
China	CN		Liu et al., 2012 [3]		HQ655897	RnHD13
China	CN		Liu et al., 2012 [3]		HQ655898	RnHD13
China	CN		Liu et al., 2012 [3]		HQ655899	RnHD11
China	CN		Liu et al., 2012 [3]		HQ655900	RnHD11
China	CN		Liu et al., 2012 [3]		HQ655901	RnHD11
China	CN		Liu et al., 2012 [3]		HQ655902	RnHD11
China	CN		Liu et al., 2012 [3]		HQ655903	RnHD11
China	CN		Liu et al., 2012 [3]		HQ655904	RnHD11
China	CN		Liu et al., 2012 [3]		HQ655905	RnHD11
China	CN		Liu et al., 2012 [3]		HQ655906	RnHD12
China	CN		Liu et al., 2012 [3]		HQ655907	RnHD12
China	CN		Liu et al., 2012 [3]		HQ655908	RnHD12
China	CN		Liu et al., 2012 [3]		HQ655909	RnHD12
China	CN		Liu et al., 2012 [3]		HQ655910	RnHD13
China	CN		Liu et al., 2012 [3]		HQ655911	RnHD10
China	CN		Liu et al., 2012 [3]		HQ655912	RnHD14
China	CN		Liu et al., 2012 [3]		HQ655913	RnHD15
China	CN		Liu et al., 2012 [3]		HQ655914	RnHD16
China	CN		Liu et al., 2012 [3]		HQ655915	RnHD15
Denmark	DK		Nilsson et al., 2003 [4]		AJ428514	RnHD02
French Polynesia	PF		Robins et al., 2007 [5]		EF186347	RnHD03
Society Islands	PF		Robins et al., 2007 [5]		EF186346	RnHD01
USA	US		Schlick et al., 2006 [6]		DQ673916	RnHD03
Japan	JP		Schlick et al.,2006 [6]		DQ673917	RnHD18
France	FR		Song et al., 2014 [7]		JX887168	RnHD01
France	FR		Song et al., 2014 [7]		JX887168	RnHD01
France	FR		Song et al., 2014 [7]		JX887169	RnHD03
France	FR		Song et al., 2014 [7]		JX887169	RnHD03
France	FR		Song et al., 2014 [7]		JX887169	RnHD03
France	FR		Song et al., 2014 [7]		JX887169	RnHD03
France	FR		Song et al., 2014 [7]		JX887172	RnHD20
France	FR		Song et al., 2014 [7]		JX887169	RnHD03
France	FR		Song et al., 2014 [7]		JX887169	RnHD03
France	FR		Song et al., 2014 [7]		JX887169	RnHD03
France	FR		Song et al., 2014 [7]		JX887169	RnHD03
France	FR		Song et al., 2014 [7]		JX887168	RnHD01
France	FR		Song et al., 2014 [7]		JX887169	RnHD03
France	FR		Song et al., 2014 [7]		JX887169	RnHD03
France	FR		Song et al., 2014 [7]		JX887168	RnHD01
France	FR		Song et al., 2014 [7]		JX887169	RnHD03
Germany	DE	Olfen	Song et al., 2014 [7]		JX887169	RnHD03
Germany	DE	Olfen	Song et al., 2014 [7]		JX887169	RnHD03
Germany	DE	Olfen	Song et al., 2014 [7]		JX887169	RnHD03
Germany	DE	Ludwigshafen	Song et al., 2014 [7]		JX887169	RnHD03
Germany	DE	Ludwigshafen	Song et al., 2014 [7]		JX887169	RnHD03
Germany	DE	Ludwigshafen	Song et al., 2014 [7]		JX887169	RnHD03
Germany	DE	Ludwigshafen	Song et al., 2014 [7]		JX887169	RnHD03
Germany	DE	Ludwigshafen	Song et al., 2014 [7]		JX887169	RnHD03
Germany	DE	Ludwigshafen	Song et al., 2014 [7]		JX887169	RnHD03
Germany	DE	Ludwigshafen	Song et al., 2014 [7]		JX887169	RnHD03
Germany	DE	Ludwigshafen	Song et al., 2014 [7]		JX887169	RnHD03
Germany	DE	Ludwigshafen	Song et al., 2014 [7]		JX887169	RnHD03
Germany	DE	Ludwigshafen	Song et al., 2014 [7]		JX887169	RnHD03
Germany	DE	Ludwigshafen	Song et al., 2014 [7]		JX887169	RnHD03
Germany	DE	Dorsten	Song et al., 2014 [7]		JX887169	RnHD03
Germany	DE	Dorsten	Song et al., 2014 [7]		JX887169	RnHD03
Germany	DE	Dorsten	Song et al., 2014 [7]		JX887169	RnHD03
Germany	DE	Dorsten	Song et al., 2014 [7]		JX887169	RnHD03
Germany	DE	Dorsten	Song et al., 2014 [7]		JX887169	RnHD03
Germany	DE	Dorsten	Song et al., 2014 [7]		JX887169	RnHD03
Germany	DE	Dorsten	Song et al., 2014 [7]		JX887169	RnHD03
Germany	DE	Dorsten	Song et al., 2014 [7]		JX887169	RnHD03
Germany	DE	Dorsten	Song et al., 2014 [7]		JX887169	RnHD03
Germany	DE	Dorsten	Song et al., 2014 [7]		JX887169	RnHD03
Germany	DE	Dorsten	Song et al., 2014 [7]		JX887169	RnHD03
Germany	DE	Dorsten	Song et al., 2014 [7]		JX887169	RnHD03
Germany	DE	Dorsten	Song et al., 2014 [7]		JX887169	RnHD03
Germany	DE	Dorsten	Song et al., 2014 [7]		JX887169	RnHD03
Germany	DE	Dorsten	Song et al., 2014 [7]		JX887169	RnHD03
Germany	DE	Dorsten	Song et al., 2014 [7]		JX887169	RnHD03
Germany	DE	Dorsten	Song et al., 2014 [7]		JX887169	RnHD03
Germany	DE	Dorsten	Song et al., 2014 [7]		JX887169	RnHD03
Germany	DE	Dorsten	Song et al., 2014 [7]		JX887169	RnHD03
Germany	DE	Drensteinfurt	Song et al., 2014 [7]		JX887169	RnHD03
Germany	DE	Drensteinfurt	Song et al., 2014 [7]		JX887169	RnHD03
Germany	DE	Drensteinfurt	Song et al., 2014 [7]		JX887169	RnHD03
Germany	DE	Drensteinfurt	Song et al., 2014 [7]		JX887169	RnHD03
Germany	DE	Drensteinfurt	Song et al., 2014 [7]		JX887169	RnHD03
Germany	DE	Drensteinfurt	Song et al., 2014 [7]		JX887169	RnHD03
Germany	DE	Drensteinfurt	Song et al., 2014 [7]		JX887169	RnHD03
Germany	DE	Drensteinfurt	Song et al., 2014 [7]		JX887169	RnHD03
Germany	DE	Drensteinfurt	Song et al., 2014 [7]		JX887169	RnHD03
Germany	DE	Drensteinfurt	Song et al., 2014 [7]		JX887169	RnHD03
Germany	DE	Drensteinfurt	Song et al., 2014 [7]		JX887169	RnHD03
Germany	DE	Stadtlohn	Song et al., 2014 [7]		JX887169	RnHD03
Germany	DE	Stadtlohn	Song et al., 2014 [7]		JX887169	RnHD03
Germany	DE	Stadtlohn	Song et al., 2014 [7]		JX887169	RnHD03
Germany	DE	Stadtlohn	Song et al., 2014 [7]		JX887169	RnHD03
Germany	DE	Stadtlohn	Song et al., 2014 [7]		JX887169	RnHD03
Germany	DE	Stadtlohn	Song et al., 2014 [7]		JX887169	RnHD03
Germany	DE	Stadtlohn	Song et al., 2014 [7]		JX887169	RnHD03
Germany	DE	Stadtlohn	Song et al., 2014 [7]		JX887169	RnHD03
Germany	DE	Stadtlohn	Song et al., 2014 [7]		JX887169	RnHD03
Germany	DE	Stadtlohn	Song et al., 2014 [7]		JX887169	RnHD03
Germany	DE	Stadtlohn	Song et al., 2014 [7]		JX887169	RnHD03
Germany	DE	Stadtlohn	Song et al., 2014 [7]		JX887169	RnHD03
Germany	DE	Stadtlohn	Song et al., 2014 [7]		JX887169	RnHD03
Germany	DE	Stadtlohn	Song et al., 2014 [7]		JX887169	RnHD03
Germany	DE	Stadtlohn	Song et al., 2014 [7]		JX887169	RnHD03
Germany	DE	Stadtlohn	Song et al., 2014 [7]		JX887169	RnHD03
Germany	DE	Stadtlohn	Song et al., 2014 [7]		JX887169	RnHD03
Germany	DE	Stadtlohn	Song et al., 2014 [7]		JX887169	RnHD03
Germany	DE	Stadtlohn	Song et al., 2014 [7]		JX887169	RnHD03
Germany	DE	Stadtlohn	Song et al., 2014 [7]		JX887169	RnHD03
Germany	DE	Stadtlohn	Song et al., 2014 [7]		JX887169	RnHD03
Germany	DE	Stadtlohn	Song et al., 2014 [7]		JX887169	RnHD03
Germany	DE	Stadtlohn	Song et al., 2014 [7]		JX887169	RnHD03
Germany	DE	Stadtlohn	Song et al., 2014 [7]		JX887169	RnHD03
Germany	DE	Stadtlohn	Song et al., 2014 [7]		JX887169	RnHD03
Germany	DE	Stadtlohn	Song et al., 2014 [7]		JX887169	RnHD03
Germany	DE	Stadtlohn	Song et al., 2014 [7]		JX887169	RnHD03
Germany	DE	Olfen	Song et al., 2014 [7]		JX887169	RnHD03
Germany	DE	Olfen	Song et al., 2014 [7]		JX887169	RnHD03
Germany	DE	Drensteinfurt	Song et al., 2014 [7]		JX887169	RnHD03
Germany	DE	Drensteinfurt	Song et al., 2014 [7]		JX887169	RnHD03
Germany	DE	Drensteinfurt	Song et al., 2014 [7]		JX887169	RnHD03
Germany	DE	Dorsten	Song et al., 2014 [7]		JX887169	RnHD03
Germany	DE	Dorsten	Song et al., 2014 [7]		JX887169	RnHD03
Germany	DE	Dorsten	Song et al., 2014 [7]		JX887169	RnHD03
Germany	DE	Velen	Song et al., 2014 [7]		JX887169	RnHD03
Germany	DE	Velen	Song et al., 2014 [7]		JX887169	RnHD03
Germany	DE	Munster	Song et al., 2014 [7]		JX887169	RnHD03
Germany	DE	Olfen	Song et al., 2014 [7]		JX887169	RnHD03
Germany	DE	Stadtlohn	Song et al., 2014 [7]		JX887169	RnHD03
Germany	DE	Munster	Song et al., 2014 [7]		JX887169	RnHD03
Germany	DE	Beerlage	Song et al., 2014 [7]		JX887169	RnHD03
Germany	DE	Munster	Song et al., 2014 [7]		JX887169	RnHD03
Germany	DE	Stadtlohn	Song et al., 2014 [7]		JX887169	RnHD03
Germany	DE	Vreden	Song et al., 2014 [7]		JX887169	RnHD03
Germany	DE	Stadtlohn	Song et al., 2014 [7]		JX887169	RnHD03
Germany	DE	Nordkirchen	Song et al., 2014 [7]		JX887169	RnHD03
Germany	DE	Stadtlohn	Song et al., 2014 [7]		JX887169	RnHD03
Germany	DE	Stadtlohn	Song et al., 2014 [7]		JX887169	RnHD03
Germany	DE	Nordkirchen	Song et al., 2014 [7]		JX887169	RnHD03
Germany	DE	Beerlage	Song et al., 2014 [7]		JX887169	RnHD03
Germany	DE	Stadtlohn	Song et al., 2014 [7]		JX887169	RnHD03
Germany	DE	Vreden	Song et al., 2014 [7]		JX887169	RnHD03
Germany	DE	Nordkirchen	Song et al., 2014 [7]		JX887169	RnHD03
Germany	DE	Vreden	Song et al., 2014 [7]		JX887169	RnHD03
Germany	DE	Stadtlohn	Song et al., 2014 [7]		JX887169	RnHD03
Germany	DE	Beerlage	Song et al., 2014 [7]		JX887169	RnHD03
Germany	DE	Beerlage	Song et al., 2014 [7]		JX887169	RnHD03
Germany	DE	Senden	Song et al., 2014 [7]		JX887169	RnHD03
Germany	DE	Nordkirchen	Song et al., 2014 [7]		JX887169	RnHD03
Germany	DE	Nordkirchen	Song et al., 2014 [7]		JX887169	RnHD03
Germany	DE	Senden	Song et al., 2014 [7]		JX887169	RnHD03
Germany	DE	Nordkirchen	Song et al., 2014 [7]		JX887169	RnHD03
Germany	DE	Nordkirchen	Song et al., 2014 [7]		JX887169	RnHD03
Germany	DE	Beerlage	Song et al., 2014 [7]		JX887169	RnHD03
Germany	DE	Senden	Song et al., 2014 [7]		JX887169	RnHD03
Germany	DE	Nordkirchen	Song et al., 2014 [7]		JX887169	RnHD03
Germany	DE	Nordkirchen	Song et al., 2014 [7]		JX887169	RnHD03
Germany	DE	Olfen	Song et al., 2014 [7]		JX887165	RnHD03
Germany	DE	Olfen	Song et al., 2014 [7]		JX887165	RnHD03
Germany	DE	Olfen	Song et al., 2014 [7]		JX887165	RnHD03
Germany	DE	Olfen	Song et al., 2014 [7]		JX887165	RnHD03
Germany	DE	Olfen	Song et al., 2014 [7]		JX887165	RnHD03
Germany	DE	Olfen	Song et al., 2014 [7]		JX887165	RnHD03
Germany	DE	Olfen	Song et al., 2014 [7]		JX887165	RnHD03
Germany	DE	Olfen	Song et al., 2014 [7]		JX887165	RnHD03
Germany	DE	Olfen	Song et al., 2014 [7]		JX887165	RnHD03
Germany	DE	Olfen	Song et al., 2014 [7]		JX887165	RnHD03
Germany	DE	Olfen	Song et al., 2014 [7]		JX887165	RnHD03
Germany	DE	Olfen	Song et al., 2014 [7]		JX887165	RnHD03
Germany	DE	Olfen	Song et al., 2014 [7]		JX887165	RnHD03
Germany	DE	Olfen	Song et al., 2014 [7]		JX887165	RnHD03
Germany	DE	Olfen	Song et al., 2014 [7]		JX887165	RnHD03
Germany	DE	Olfen	Song et al., 2014 [7]		JX887165	RnHD03
Germany	DE	Olfen	Song et al., 2014 [7]		JX887165	RnHD03
Germany	DE	Olfen	Song et al., 2014 [7]		JX887165	RnHD03
Germany	DE	Olfen	Song et al., 2014 [7]		JX887165	RnHD03
Germany	DE	Olfen	Song et al., 2014 [7]		JX887165	RnHD03
Germany	DE	Olfen	Song et al., 2014 [7]		JX887165	RnHD03
Germany	DE	Olfen	Song et al., 2014 [7]		JX887165	RnHD03
Germany	DE	Olfen	Song et al., 2014 [7]		JX887165	RnHD03
Germany	DE	Olfen	Song et al., 2014 [7]		JX887165	RnHD03
Germany	DE	Olfen	Song et al., 2014 [7]		JX887165	RnHD03
Germany	DE	Ludwigshafen	Song et al., 2014 [7]		JX887170	RnHD18
Germany	DE	Drensteinfurt	Song et al., 2014 [7]		JX887166	RnHD17
Germany	DE	Drensteinfurt	Song et al., 2014 [7]		JX887166	RnHD17
Germany	DE	Drensteinfurt	Song et al., 2014 [7]		JX887166	RnHD17
Germany	DE	Olfen	Song et al., 2014 [7]		JX887168	RnHD01
Germany	DE	Velen	Song et al., 2014 [7]		JX887167	RnHD03
Germany	DE	Velen	Song et al., 2014 [7]		JX887167	RnHD03
Germany	DE	Velen	Song et al., 2014 [7]		JX887167	RnHD03
Germany	DE	Velen	Song et al., 2014 [7]		JX887167	RnHD03
Germany	DE	Velen	Song et al., 2014 [7]		JX887167	RnHD03
Germany	DE	Velen	Song et al., 2014 [7]		JX887167	RnHD03
Germany	DE	Velen	Song et al., 2014 [7]		JX887167	RnHD03
Germany	DE	Velen	Song et al., 2014 [7]		JX887167	RnHD03
Germany	DE	Magdeburg	Song et al., 2014 [7]		JX887171	RnHD19
Germany	DE	Magdeburg	Song et al., 2014 [7]		JX887171	RnHD19
Germany	DE	Magdeburg	Song et al., 2014 [7]		JX887171	RnHD19
Germany	DE	Dorsten	Song et al., 2014 [7]		JX887173	RnHD03
Germany	DE	Drensteinfurt	Song et al., 2014 [7]		JX887174	RnHD21
Brazil	BR	Fortaleza	this study	Rn_ZC93	KY328831	RnHD01
Brazil	BR	Recife, Brazil	this study	BFdN006	KY328830	RnHD03
Brazil	BR	Fernando de Noronha, Brazil	this study	BFdN007	KY328831	RnHD01
Falklands	FK	Bleaker Island South	this study	FBlS298	KY328831	RnHD01
Falklands	FK	Bleaker Island South	this study	FBlS299	KY328831	RnHD01
Falklands	FK	Bleaker Island South	this study	FBlS301	KY328831	RnHD01
Falklands	FK	Urchin Island	this study	FUrch506	KY328831	RnHD01
Falklands	FK	Urchin Island	this study	FUrch507	KY328831	RnHD01
Falklands	FK	Tussac Island	this study	FTus004	KY328830	RnHD03
Falklands	FK	Tussac Island	this study	FTus006	KY328830	RnHD03
Falklands	FK	Natural Arch Island	this study	FNaA030	KY328830	RnHD03
Falklands	FK	Natural Arch Island	this study	FNaA034	KY328830	RnHD03
Falklands	FK	Natural Arch Island	this study	FNaA036	KY328830	RnHD03
Falklands	FK	Big Arch Island	this study	FBiA051	KY328830	RnHD03
Falklands	FK	Big Arch Island	this study	FBiA052	KY328830	RnHD03
Falklands	FK	Big Arch Island	this study	FBiA063	KY328830	RnHD03
Falklands	FK	Sandbar Island	this study	FSan077	KY328830	RnHD03
Falklands	FK	Sandbar Island	this study	FSan081	KY328830	RnHD03
Falklands	FK	Middle Island	this study	FMid141	KY328830	RnHD03
Falklands	FK	Kent Island	this study	FKen144	KY328830	RnHD03
Falklands	FK	Kent Island	this study	FKen147	KY328830	RnHD03
Falklands	FK	Kent Island	this study	FKen155	KY328830	RnHD03
Falklands	FK	Rabbit Island	this study	FRab162	KY328830	RnHD03
Falklands	FK	Rabbit Island	this study	FRab163	KY328830	RnHD03
Falklands	FK	Rabbit Island	this study	FRab166	KY328830	RnHD03
Falklands	FK	Middle Island	this study	FMid175	KY328830	RnHD03
Falklands	FK	Bleaker Island Settlement	this study	FBlS236	KY328831	RnHD01
Falklands	FK	Bleaker Island Settlement	this study	FBlS245	KY328831	RnHD01
Falklands	FK	Bleaker Island Settlement	this study	FBlS246	KY328831	RnHD01
Falklands	FK	Urchin Island	this study	FUrch515	KY328831	RnHD01
Falklands	FK	Cassies	this study	FCas540	KY328831	RnHD01
Falklands	FK	Cassies	this study	FCas549	KY328831	RnHD01
Falklands	FK	Driftwood Island	this study	FDrift552	KY328831	RnHD01
Falklands	FK	Driftwood Island	this study	FDrift555	KY328831	RnHD01
Falklands	FK	Driftwood Island	this study	FDrift556	KY328831	RnHD01
Falklands	FK	Cassies	this study	FCas570	KY328831	RnHD01
Falklands	FK	Pleasant Island	this study	FPlI001	KY328831	RnHD01
Falklands	FK	Pleasant Island	this study	FPlI002	KY328831	RnHD01
Falklands	FK	East Island	this study	FEaI017	KY328831	RnHD01
Falklands	FK	Pleasant Island	this study	FPI028	KY328831	RnHD01
Falklands	FK	East Island	this study	FEaI033	KY328831	RnHD01
Falklands	FK	East Island	this study	FEaI037	KY328831	RnHD01
Falklands	FK	Stanley	this study	FST045	KY328831	RnHD01
Falklands	FK	Stanley	this study	FST046	KY328831	RnHD01
Falklands	FK	Stanley	this study	FST048	KY328831	RnHD01
Falklands	FK	Stanley	this study	FST051	KY328831	RnHD01
Falklands	FK	Narrows Island	this study	FNaIDR09	KY328831	RnHD01
Falklands	FK	Scott Island	this study	FScIDR12	KY328831	RnHD01
Falklands	FK	Scott Island	this study	FScIDR13	KY328831	RnHD01
Falklands	FK	Walker Creek	this study	FWaCDR14	KY328831	RnHD01
Portugal	PT	Moscavide	this study	Rn_ZC148	KY328831	RnHD01
Portugal	PT	Mafra	this study	Rn_ZC535	KY328831	RnHD01
Portugal	PT	Viana do Alentejo	this study	Rn_ZC3	KY328832	RnHD27
Portugal	PT	Patameira de Cima	this study	Rn_ZC283	KY328831	RnHD01
Portugal	PT-30	Madeira	this study	RnZC265	KY328830	RnHD03
South Georgia	GS	Salisbury2	this study		KY328831	RnHD01
South Georgia	GS	Right Whale	this study		KY328831	RnHD01
South Georgia	GS	Prince Olav	this study		KY328831	RnHD01
South Georgia	GS	Grytviken	this study		KY328833	RnHD02
South Georgia	GS	Barff	this study		KY328833	RnHD02
South Georgia	GS	Greene	this study		KY328833	RnHD02
South Georgia	GS	Maiviken	this study		KY328833	RnHD02
South Georgia	GS	Salisbury1	this study		KY328831	RnHD01
United Kingdom	SH-HL	Saint Helena	this study	S641_1	KY328833	RnHD02
1. Abhyankar, A.; Park, H.-B.; Tonolo, G.; Luthman, H. Comparative sequence analysis of the non-protein-coding mitochondrial DNA of inbred rat strains. PLoS ONE 2009, 4, e8148.
2. Haniza, M.Z.H.; Adams, S.; Jones, E.P.; MacNicoll, A.; Mallon, E.B.; Smith, R.H.; Lambert, M.S. Large-scale structure of brown rat (Rattus norvegicus) populations in England: Effects on rodenticide resistance. PeerJ. 2015, 3, e1458.
3. Liu, J.; Liu, D.-Y.; Chen, W.; Li, J.-L.; Luo, F.; Li, Q.; Ling, J.-X.; Liu, Y.-Y.; Xiong, H.-R.; Ding, X.-H.; et al. Genetic analysis of hantaviruses and their rodent hosts in central-south China. Virus Res. 2012, 163, 439–447.
4. Nilsson, M.A.; Gullberg, A.; Spotorno, A.E.; Arnason, U.; Janke, A. Radiation of extant marsupials after the K/T boundary: Evidence from complete mitochondrial genomes. J. Mol. Evol. 2003, 57, S3–S12.
5. Robins, J.H.; Hingston, M.; Matisoo-Smith, E.; Ross, H.A. Identifying Rattus species using mitochondrial DNA. Mol. Ecol. Notes 2007, 7, 717–729.
6 Schlick, N.E.; Jensen-Seaman, M.I.; Orlebeke, K.; Kwitek, A.E.; Jacob, H.J.; Lazar, J. Sequence analysis of the complete mitochondrial DNA in 10 commonly used inbred rat strains. Am. J. Physiol. Cell Physiol. 2006, 291, C1183–C1192.
7. Song, Y.; Lan, Z.; Kohn, M.H. Mitochondrial DNA phylogeography of the Norway rat. PLoS ONE 2014, 9, e88425.
